# Supplementary material
Source: PubMed Central journal article supplement (PMC6726506)
Supplement: NIHMS1532937-supplement-3.pdf [file NIHMS1532937-supplement-3.pdf]

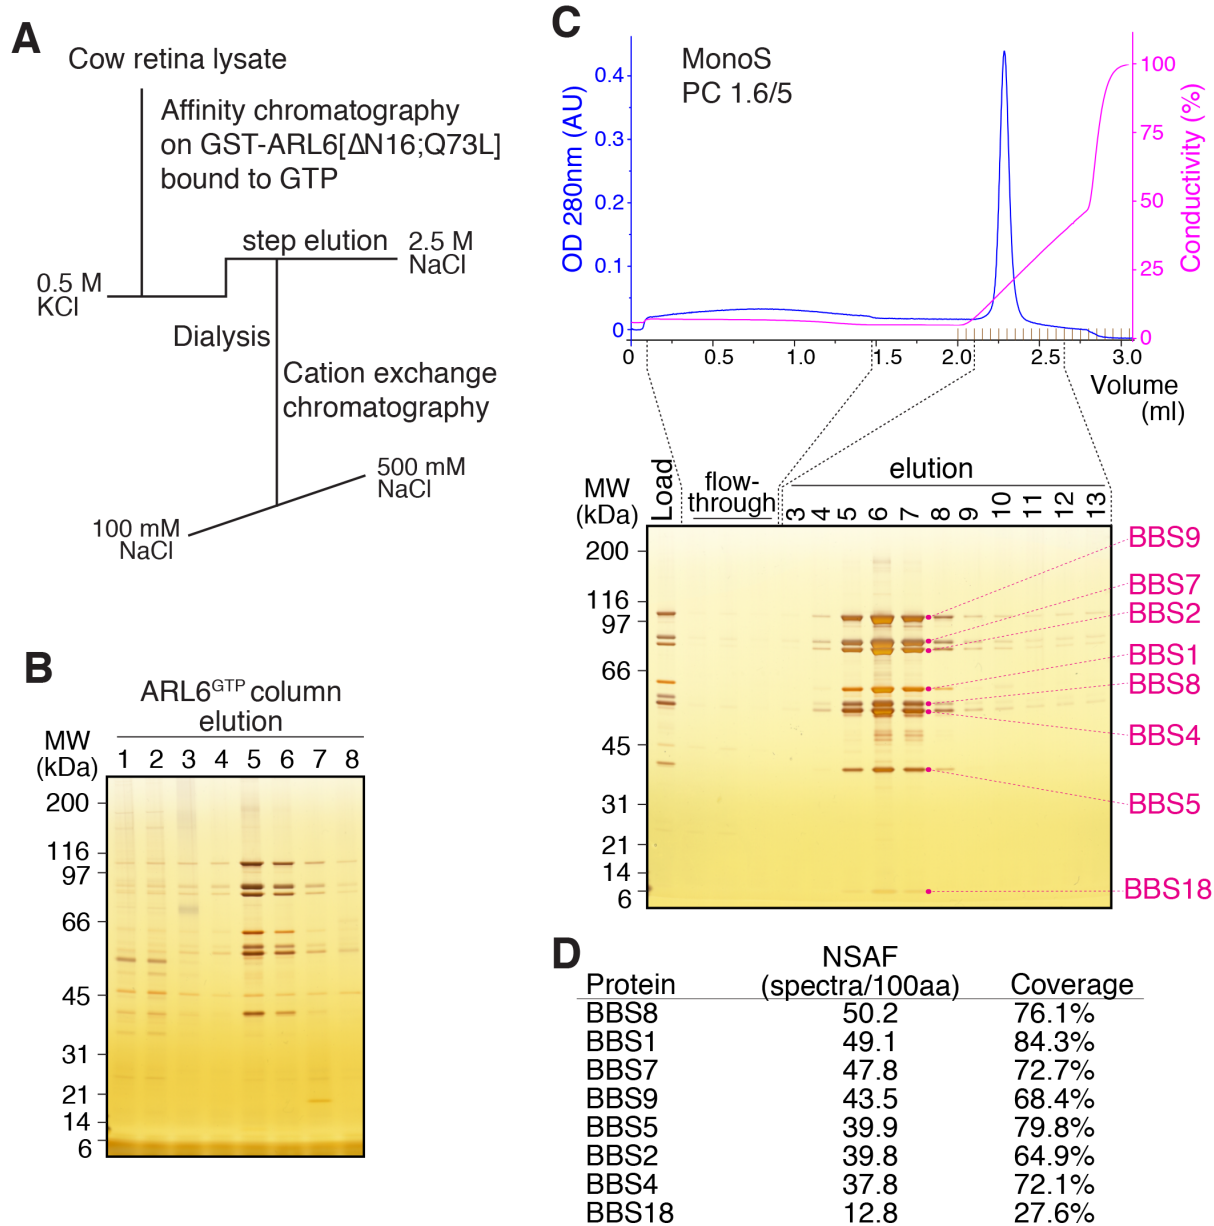

**Figure S1, related to STAR Methods and Figure 1. Purification of native BBSome. A.** Workflow for the purification of native BBSome from cow retina. **B.** Silver-stained 4-12% SDS-PAGE gel of fractions eluting from the ARL6<sup>GTP</sup>-affinity column. **C.** Chromatogram (top) and silver-stained 4-12% SDS-PAGE gel of elution fractions (bottom) from the MonoS column. **D.** Mass spectrometric identification of the eight BBSome subunits in the peak fraction. NSAF, normalized spectral abundance factor (Zybailov et al., 2006).

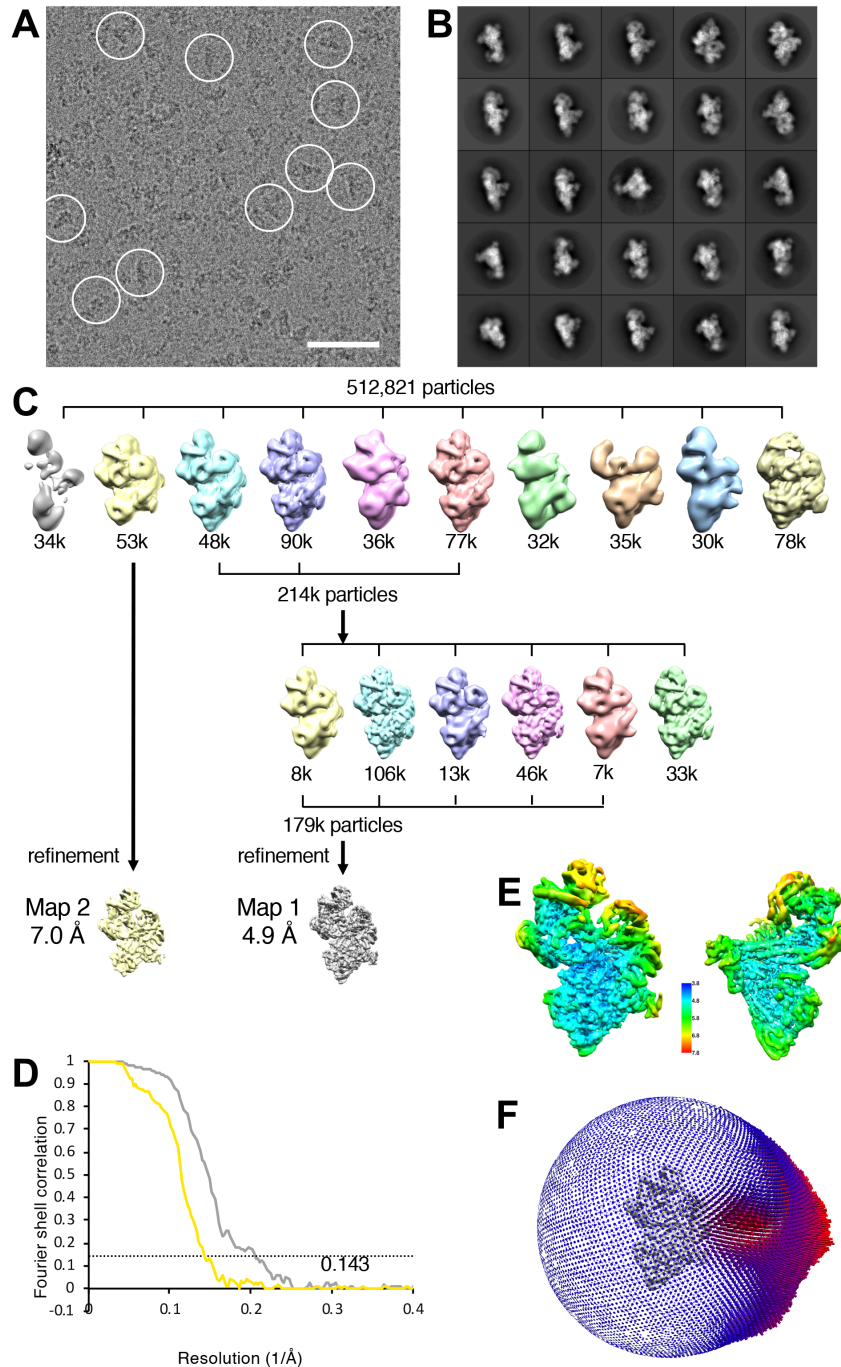

**Figure S2, related to STAR Methods and Figures 1 and 2. Cryo-EM analysis of native BBSome.** **A.** Cryo-EM image of vitrified BBSome processed with MotionCor2. Some particles are circled. Scale bar: 50 nm. **B.** Selected 2D class averages obtained with Relion 1.3. Side length of individual averages: 20 nm. **C.** Image-processing workflow for 3D classifications and refinement in Relion 1.3 that yielded the four density maps discussed in the main text. See Methods section for details. **D.** Fourier shell correlation curves calculated between independently refined half maps for the four BBSome density maps colored as in C. **E.** Local resolution for Map 1 as determined by using the ResMap algorithm included in Relion.

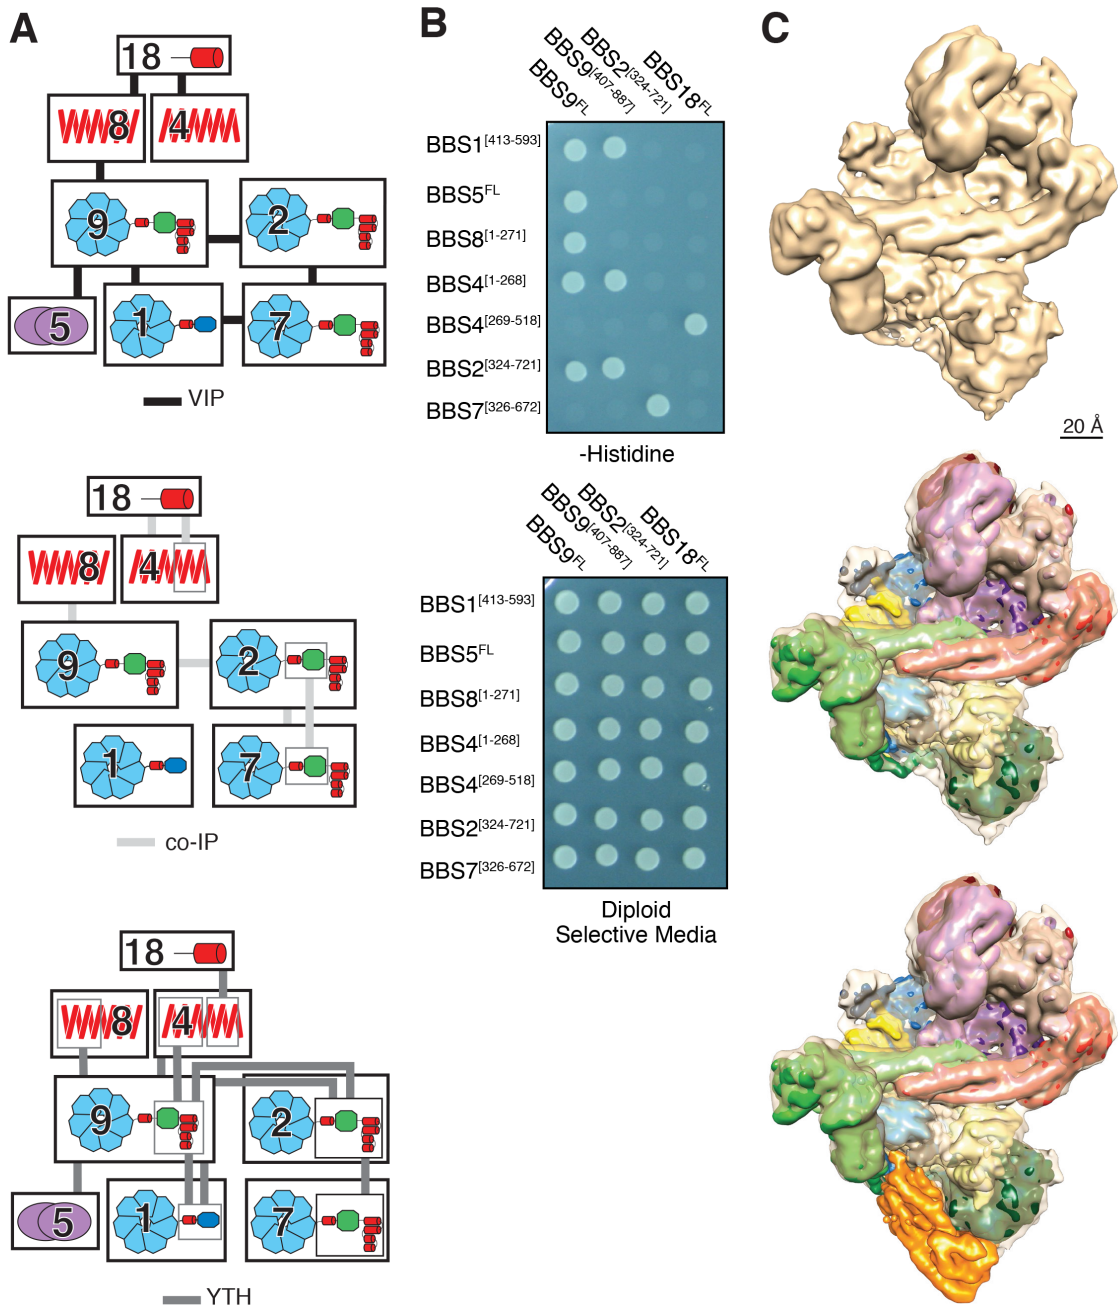

**Figure S3, related to Figure 2. Interactions between domains of BBSome subunits and map differences. A.** The three interaction datasets used to assign subunits to density in the cryo-EM map: VIP, visual immunoprecipitation; co-IP, co-immunoprecipitation; YTH, yeast-two hybrid. **B.** YTH array. *Upper panel:* Binary interactions between BBS Y2H constructs (column: bait, row: prey) as indicated by yeast colony growth on medium lacking histidine, tryptophan and leucine. *Lower panel:* Growth control for yeast mating by diploid selection on medium lacking tryptophan and leucine. **C.** *Top panel:* Map 2 at 7.0-Å resolution in opaque sand color. *Middle and bottom panels:* Comparison of Map 2 (transparent sand) with segmented Map 1 (colored segments). The orange region is removed in the middle panel and included in the bottom panel. Note that the orange segment makes extensive contacts with the  $\beta$ -propeller in the base (dark green).

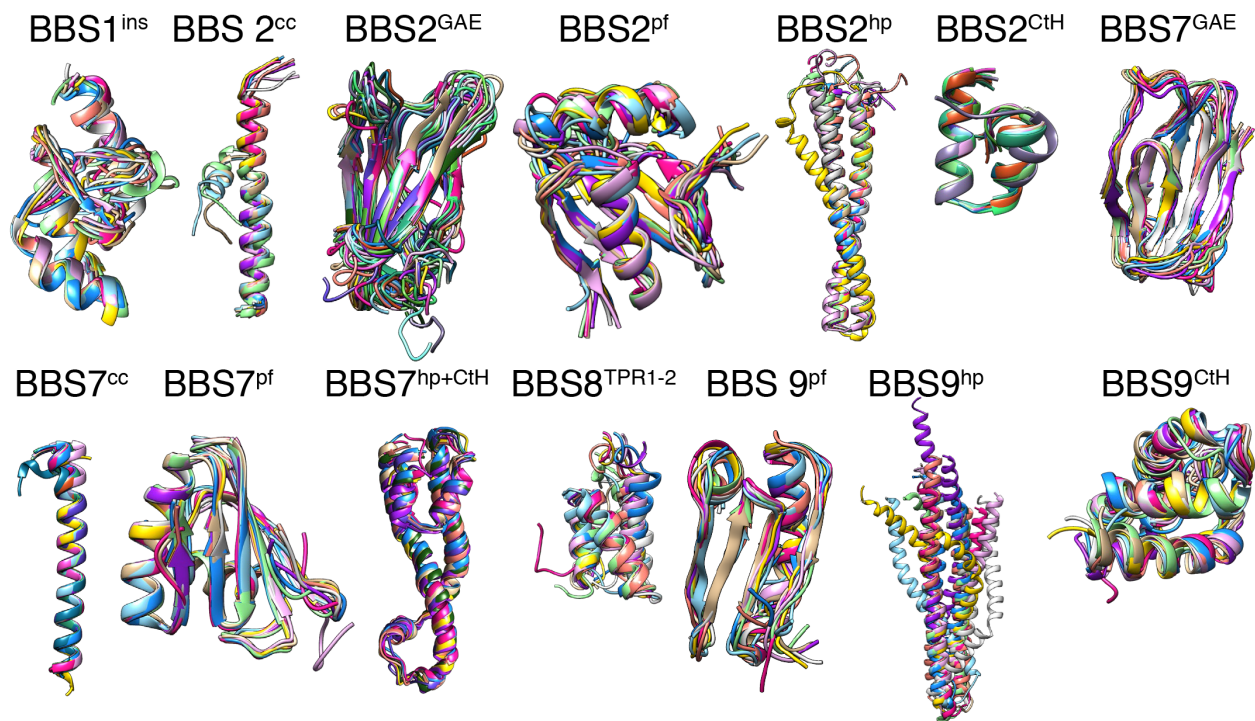

**Figure S4, related to STAR Methods. Details of Rosetta modeling.** Top 10 scoring models for the 15 domains that could be modeled with the Rosetta *ab initio* protocol. For BBS7<sup>hp</sup> and BBS9<sup>CtH</sup>, the *ab initio* modeling only converged for a core segment. The top 10 models shown for these two domains were obtained after the consistent core segments were placed into the cryo-EM map and the unassigned segments were modeled in the context of the density with Rosetta CM.

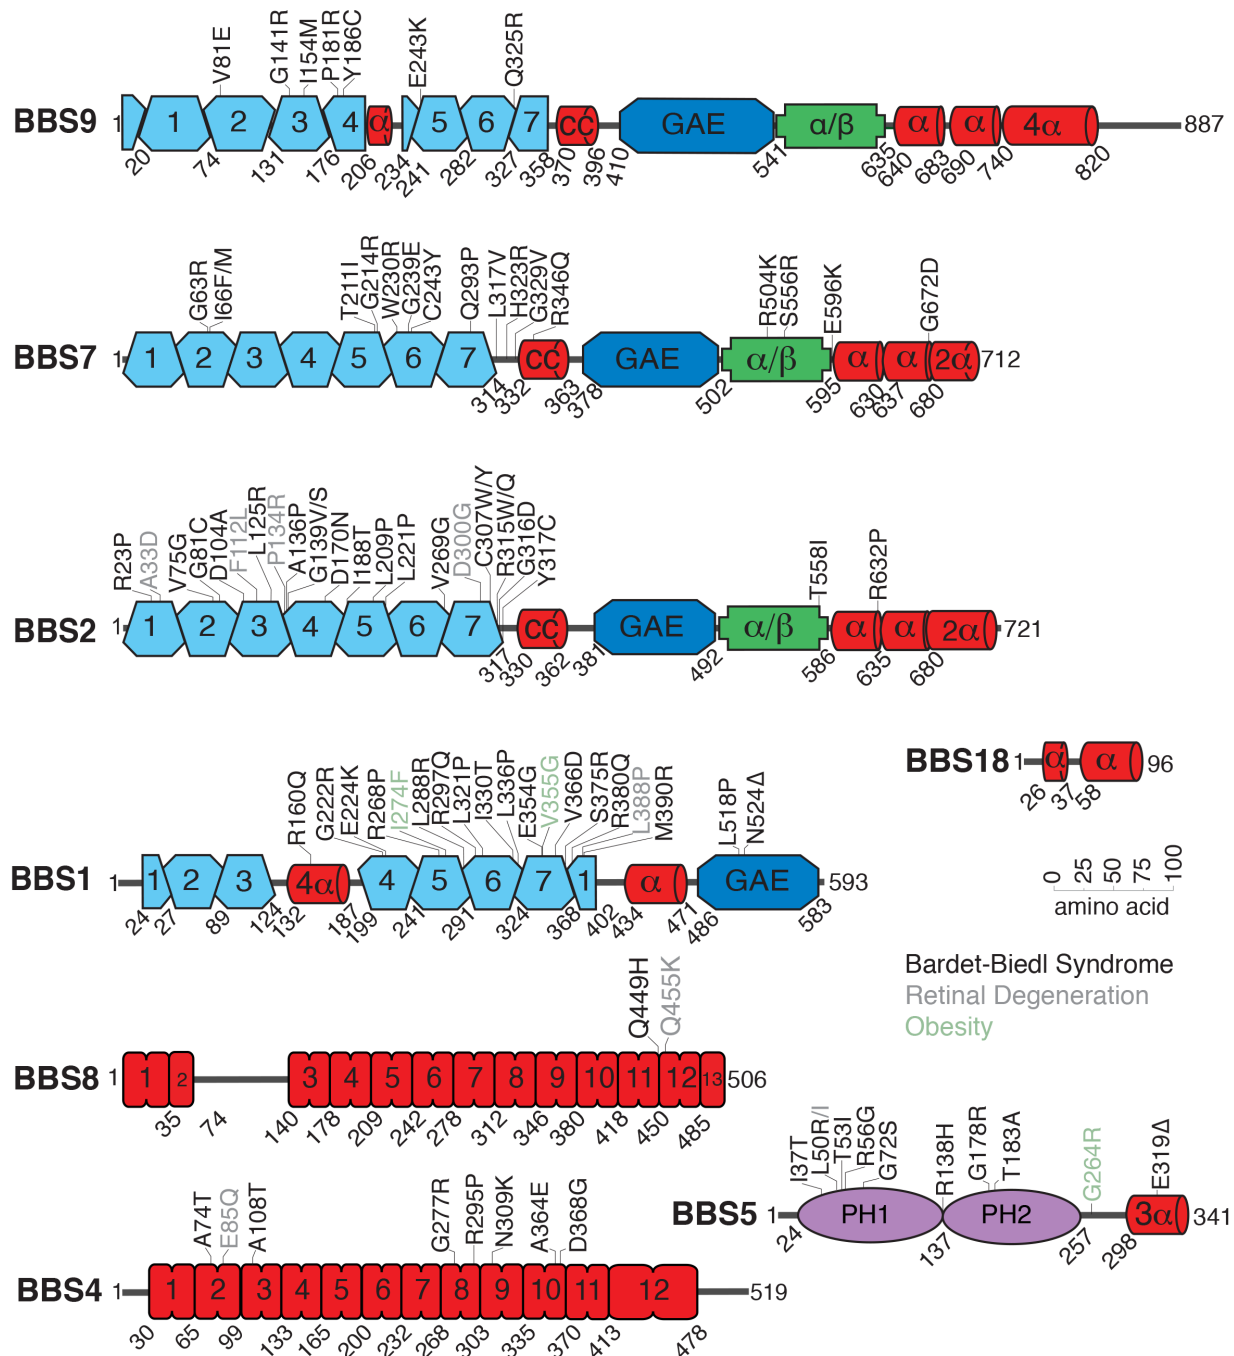

**Figure S5, related to Figure 4. Disease-causing variants in BBSome subunits.** BBSome subunits with positions of known disease-causing human variants. Variants causing Bardet-Biedl syndrome are labeled in black, variants causing retinal degeneration in gray, and variants causing obesity in green. Numbers below the subunits denote domain boundaries.

**Table S1, related to Figure 2.** Binary interactions between BBSome subunits reported by VIP (Katoh et al., 2015), co-IP (Nachury et al., 2007; Zhang et al., 2012a, 2013) and YTH (Woodsmith et al., 2017).

| <b>Bait</b>  |         | <b>Prey</b>  |         | <b>Method</b> | <b>Reference</b>     |
|--------------|---------|--------------|---------|---------------|----------------------|
| <b>BBS5</b>  | FL      | <b>BBS9</b>  | FL      | <b>VIP</b>    | Katoh et al., 2015   |
| <b>BBS9</b>  | FL      | <b>BBS5</b>  | FL      | <b>VIP</b>    | Katoh et al., 2015   |
| <b>BBS9</b>  | FL      | <b>BBS8</b>  | FL      | <b>Co-IP</b>  | Nachury et al., 2007 |
| <b>BBS8</b>  | FL      | <b>BBS9</b>  | FL      | <b>VIP</b>    | Katoh et al., 2015   |
| <b>BBS9</b>  | FL      | <b>BBS8</b>  | FL      | <b>VIP</b>    | Katoh et al., 2015   |
| <b>BBS1</b>  | FL      | <b>BBS9</b>  | FL      | <b>VIP</b>    | Katoh et al., 2015   |
| <b>BBS9</b>  | FL      | <b>BBS1</b>  | FL      | <b>VIP</b>    | Katoh et al., 2015   |
| <b>BBS9</b>  | FL      | <b>BBS2</b>  | FL      | <b>CoIP</b>   | Zhang et al., 2012a  |
| <b>BBS2</b>  | FL      | <b>BBS9</b>  | FL      | <b>CoIP</b>   | Nachury et al., 2007 |
| <b>BBS2</b>  | FL      | <b>BBS9</b>  | FL      | <b>VIP</b>    | Katoh et al., 2015   |
| <b>BBS9</b>  | FL      | <b>BBS2</b>  | FL      | <b>VIP</b>    | Katoh et al., 2015   |
| <b>BBS2</b>  | FL      | <b>BBS7</b>  | FL      | <b>Co-IP</b>  | Nachury et al., 2007 |
| <b>BBS2</b>  | FL      | <b>BBS7</b>  | FL      | <b>VIP</b>    | Katoh et al., 2015   |
| <b>BBS7</b>  | FL      | <b>BBS2</b>  | FL      | <b>VIP</b>    | Katoh et al., 2015   |
| <b>BBS7</b>  | FL      | <b>BBS2</b>  | 325-721 | <b>CoIP</b>   | Zhang et al., 2013   |
| <b>BBS7</b>  | FL      | <b>BBS2</b>  | 1-621   | <b>CoIP</b>   | Zhang et al., 2013   |
| <b>BBS7</b>  | 301-615 | <b>BBS2</b>  | FL      | <b>CoIP</b>   | Zhang et al., 2013   |
| <b>BBS4</b>  | 236-439 | <b>BBS18</b> | FL      | <b>CoIP</b>   | Zhang et al., 2012a  |
| <b>BBS4</b>  | FL      | <b>BBS18</b> | FL      | <b>VIP</b>    | Katoh et al., 2015   |
| <b>BBS8</b>  | FL      | <b>BBS18</b> | FL      | <b>VIP</b>    | Katoh et al., 2015   |
| <b>BBS18</b> | FL      | <b>BBS8</b>  | FL      | <b>VIP</b>    | Katoh et al., 2015   |
| <b>BBS1</b>  | FL      | <b>BBS7</b>  | FL      | <b>VIP</b>    | Katoh et al., 2015   |
| <b>BBS7</b>  | FL      | <b>BBS1</b>  | FL      | <b>VIP</b>    | Katoh et al., 2015   |

**Table S2, related to STAR Methods.** Crosslinks between and within BBSome subunits identified by mass spectrometry. The e-values for each peptide pair come from three independent experiments, one using the crosslinker BS3 and the other two using the crosslinker DSSeb. Only peptide pairs with e-values < 0.001 are included.

| <b>Experiment</b>   | <b>BS3</b> | <b>DSE_1</b> | <b>DSE_2</b> |
|---------------------|------------|--------------|--------------|
| <b>BBS4-BBS1</b>    |            |              |              |
| BBS1(80)-BBS4(25)   |            | 1.71E-006    |              |
| BBS1(80)-BBS4(5)    |            |              | 1.55E-004    |
| BBS1(143)-BBS4(5)   |            |              | 1.49E-004    |
| BBS4(25)-BBS1(192)  | 4.91E-05   | 1.30E-004    | 1.35E-004    |
| BBS4(20)-BBS1(192)  |            | 7.14E-006    |              |
| BBS4(24)-BBS1(192)  | 2.50E-04   |              | 8.12E-007    |
| BBS1(123)-BBS4(25)  | 1.35E-06   | 6.28E-006    | 2.32E-013    |
| BBS1(116)-BBS4(5)   | 2.51E-06   | 2.32E-004    |              |
| BBS1(123)-BBS4(20)  |            |              | 1.95E-005    |
| BBS1(143)-BBS4(25)  |            |              | 1.57E-010    |
| BBS1(123)-BBS4(5)   |            |              | 3.18E-005    |
| BBS1(424)-BBS4(285) | 5.73E-14   | 3.98E-009    | 1.27E-006    |
| BBS4(129)-BBS1(162) |            | 2.67E-012    |              |
| <b>BBS2-BBS7</b>    |            |              |              |
| BBS2(360)-BBS7(359) |            | 5.57E-010    | 4.91E-014    |
| BBS2(360)-BBS7(352) |            | 4.60E-006    | 7.74E-012    |
| BBS7(330)-BBS2(345) |            |              | 4.79E-005    |
| BBS7(338)-BBS2(345) |            | 3.99E-007    |              |
| BBS7(352)-BBS2(345) | 4.55E-10   | 2.99E-010    | 8.80E-012    |
| BBS2(360)-BBS7(370) |            |              | 4.12E-004    |
| BBS7(56)-BBS2(345)  |            | 1.39E-005    | 1.73E-006    |
| BBS7(658)-BBS2(13)  |            | 1.87E-010    | 4.93E-008    |
| <b>BBS4-BBS7</b>    |            |              |              |
| BBS7(604)-BBS4(5)   |            | 1.04E-006    |              |
| BBS7(222)-BBS4(5)   |            | 3.58E-007    | 1.80E-011    |
| BBS7(659)-BBS4(5)   | 2.52E-08   | 5.24E-005    | 6.09E-007    |
| BBS4(20)-BBS7(222)  |            |              | 2.74E-005    |
| BBS4(20)-BBS7(619)  |            | 7.21E-010    | 7.50E-010    |
| BBS4(20)-BBS7(659)  |            | 7.17E-011    | 3.21E-010    |

**BBS9-BBS8**

|                     |          |           |           |
|---------------------|----------|-----------|-----------|
| BBS9(226)-BBS8(179) |          | 2.39E-004 | 7.49E-004 |
| BBS9(226)-BBS8(181) | 1.99E-06 |           | 1.11E-004 |
| BBS8(181)-BBS9(231) |          | 3.71E-005 | 1.49E-006 |
| BBS9(218)-BBS8(181) | 5.94E-06 | 9.94E-008 |           |

**BBS4-BBS9**

|                     |          |           |           |
|---------------------|----------|-----------|-----------|
| BBS4(116)-BBS9(789) | 4.99E-05 |           |           |
| BBS4(118)-BBS9(786) |          | 6.27E-007 | 3.97E-005 |
| BBS9(810)-BBS4(116) |          | 6.75E-004 | 7.43E-004 |
| BBS9(789)-BBS4(118) |          | 7.85E-007 |           |
| BBS9(803)-BBS4(116) |          |           | 5.09E-004 |

**BBS1-BBS18**

|                     |  |           |           |
|---------------------|--|-----------|-----------|
| BBS1(553)-BBS18(93) |  | 7.52E-005 | 1.40E-004 |
| BBS1(553)-BBS18(90) |  |           | 2.51E-008 |

**BBS1-BBS2**

|                     |  |           |           |
|---------------------|--|-----------|-----------|
| BBS2(9)-BBS1(69)    |  | 3.28E-004 |           |
| BBS1(553)-BBS2(638) |  |           | 1.91E-004 |

**BBS1-BBS9**

|                     |  |           |           |
|---------------------|--|-----------|-----------|
| BBS9(789)-BBS1(162) |  | 6.16E-008 | 3.67E-012 |
|---------------------|--|-----------|-----------|

**BBS5-BBS18**

|                    |  |  |           |
|--------------------|--|--|-----------|
| BBS18(90)-BBS5(87) |  |  | 1.79E-005 |
|--------------------|--|--|-----------|

**BBS4-BBS4**

|                     |          |          |          |
|---------------------|----------|----------|----------|
| BBS4(20)-BBS4(25)   | 4.13E-07 |          |          |
| BBS4(5)-BBS4(25)    | 1.09E-05 |          |          |
| BBS4(24)-BBS4(5)    |          |          | 1.16E-09 |
| BBS4(153)-BBS4(118) |          |          | 4.64E-07 |
| BBS4(438)-BBS4(446) |          | 2.16E-05 |          |
| BBS4(441)-BBS4(446) |          | 2.72E-04 | 1.17E-09 |
| BBS4(480)-BBS4(441) |          | 1.18E-04 |          |
| BBS4(480)-BBS4(446) |          | 4.21E-13 | 1.07E-05 |



**BBS1-BBS1**

|                     |  |          |          |
|---------------------|--|----------|----------|
| BBS1(72)-BBS1(119)  |  |          | 2.60E-05 |
| BBS1(80)-BBS1(119)  |  | 9.32E-12 | 6.54E-15 |
| BBS1(123)-BBS1(80)  |  | 1.99E-12 | 1.13E-13 |
| BBS1(226)-BBS1(162) |  | 1.80E-13 |          |

**BBS9-BBS9**

|                     |          |          |          |
|---------------------|----------|----------|----------|
| BBS9(218)-BBS9(226) | 4.99E-05 | 2.16E-09 | 1.65E-05 |
| BBS9(397)-BBS9(386) |          | 9.08E-06 | 3.37E-06 |
| BBS9(568)-BBS9(532) |          | 2.02E-13 | 3.33E-12 |
| BBS9(568)-BBS9(542) |          | 2.19E-06 |          |
| BBS9(594)-BBS9(542) |          | 2.24E-05 | 4.08E-07 |
| BBS9(594)-BBS9(547) |          | 1.22E-04 | 5.19E-06 |
| BBS9(810)-BBS9(786) |          | 8.17E-07 | 1.94E-05 |
| BBS9(786)-BBS9(821) |          | 4.70E-04 | 7.34E-04 |
| BBS9(789)-BBS9(810) |          | 3.17E-04 |          |

**BBS7-BBS7**

|                     |  |          |          |
|---------------------|--|----------|----------|
| BBS7(31)-BBS7(48)   |  | 5.69E-09 | 5.34E-07 |
| BBS7(48)-BBS7(25)   |  | 1.63E-04 | 4.47E-04 |
| BBS7(25)-BBS7(92)   |  | 4.78E-04 |          |
| BBS7(78)-BBS7(95)   |  | 4.56E-18 | 2.17E-18 |
| BBS7(352)-BBS7(56)  |  | 1.28E-10 |          |
| BBS7(574)-BBS7(682) |  | 1.29E-09 | 1.17E-04 |
| BBS7(574)-BBS7(687) |  | 5.86E-06 | 3.74E-12 |
| BBS7(352)-BBS7(359) |  |          | 3.72E-11 |
| BBS7(609)-BBS7(659) |  | 3.64E-09 | 1.08E-06 |
| BBS7(678)-BBS7(574) |  |          | 8.79E-04 |
| BBS7(680)-BBS7(687) |  | 9.63E-06 | 5.17E-05 |

**BBS2-BBS2**

|                  |  |  |          |
|------------------|--|--|----------|
| BBS2(9)-BBS2(13) |  |  | 7.92E-08 |
|------------------|--|--|----------|

**BBS8-BBS8**

|                  |  |          |  |
|------------------|--|----------|--|
| BBS8(34)-BBS8(1) |  | 1.21E-04 |  |
|------------------|--|----------|--|

**Table S3, related to Figure 4.** Summary of missense variants in BBSome subunit genes identified in patients with BBS (black font), non-syndromic retinitis pigmentosa (RP, red font) or Leber Congenital Amaurosis (LCA, red font) or non-syndromic obesity (cyan font).

| Gene | Nucleotide        | Protein   | Phenotype | Reference                                                        |
|------|-------------------|-----------|-----------|------------------------------------------------------------------|
| BBS1 | c.479G>A          | p.R160Q   | BBS, RP   | <a href="#">Deveault (2011) Hum Mutat 32, 610</a>                |
|      |                   |           |           | <a href="#">Sharon (2015) Mol Vis 21, 783</a>                    |
| BBS1 | c.664G>C          | p.G222R   | BBS       | <a href="#">Esposito (2017) BMC Med Genet 18,</a>                |
| BBS1 | c.670G>A          | p.E224K   | BBS       | <a href="#">Redin (2012) J Med Genet 49, 502</a>                 |
| BBS1 | c.803G>C          | p.R268P   | BBS       | <a href="#">Estrada-Cuzcano (2012) Arch Ophthalmol 130, 1425</a> |
| BBS1 | c.820A>T          | p.I274F   | Obesity   | <a href="#">Gerhard (2013) Hum Hered 75, 144</a>                 |
| BBS1 | c.863T>G          | p.L288R   | BBS       | <a href="#">Muller (2010) Hum Genet 127, 583</a>                 |
| BBS1 | c.890G>A          | p.R297Q   | BBS       | <a href="#">Denniston (2014) Retina 34, 2282</a>                 |
| BBS1 | c.962T>C          | p.L321P   | BBS       | Jean Muller, unpublished                                         |
| BBS1 | c.989T>C          | p.I330T   | BBS       | <a href="#">Deveault (2011) Hum Mutat 32, 610</a>                |
| BBS1 | c.1007T>C         | p.L336P   | BBS       | Jean Muller, unpublished                                         |
| BBS1 | c.1061A>G         | p.E354G   | BBS       | <a href="#">Kim (2015) Diabetes Metab J 39, 439</a>              |
| BBS1 | c.1064T>G         | p.V355G   | Obesity   | <a href="#">Gerhard (2013) Hum Hered 75, 144</a>                 |
| BBS1 | c.1097T>A         | p.V366D   | BBS       | <a href="#">Alvarez-Satta (2014) Clin Genet 86, 601</a>          |
| BBS1 | c.1125C>G         | p.S375R   | BBS       | Jean Muller, unpublished                                         |
| BBS1 | c.1139G>A         | p.R380Q   | BBS       | <a href="#">Suzuki (2016) Clin Genet 90, 526</a>                 |
| BBS1 | c.1163T>C         | p.L388P   | RP        | <a href="#">Estrada-Cuzcano (2012) Arch Ophthalmol 130, 1425</a> |
| BBS1 | c.1169T>G         | p.M390R   | BBS       | <a href="#">Mykytyn (2002) Nat Genet 31, 435</a>                 |
| BBS1 | c.1553T>C         | p.L518P   | BBS       | <a href="#">Mykytyn (2003) Am J Hum Genet 72, 429</a>            |
| BBS1 | c.1570_1572delAAC | p.N524del | BBS       | <a href="#">Deveault (2011) Hum Mutat 32, 610</a>                |

| Gene | Nucleotide | Protein | Phenotype | Reference                                                      |
|------|------------|---------|-----------|----------------------------------------------------------------|
| BBS2 | c.68G>C    | p.R23P  | BBS       | <a href="#">Harville (2010) J Med Genet 47, 262</a>            |
|      |            |         |           | <a href="#">Karmous-Benailly (2005) Am J Hum Genet 76, 493</a> |
| BBS2 | c.98C>A    | p.A33D  | RP        | <a href="#">Shevach (2015) JAMA Ophthalmol 133, 312</a>        |
| BBS2 | c.224T>G   | p.V75G  | BBS       | <a href="#">Nishimura (2001) Hum Mol Genet 10, 865</a>         |
| BBS2 | c.241G>T   | p.G81C  | BBS       | <a href="#">Deveault (2011) Hum Mutat 32, 610</a>              |
| BBS2 | c.311A>C   | p.D104A | BBS       | <a href="#">Katsanis (2001) Science 293, 2256</a>              |
|      |            |         |           | <a href="#">Shevach (2015) JAMA Ophthalmol 133: 312</a>        |
| BBS2 | c.334T>C   | p.F112L | RP        | <a href="#">de Castro-Miró (2016) PLoS One 11, e0168966</a>    |
| BBS2 | c.374T>G   | p.L125R | BBS       | <a href="#">Billingsley (2010) J Med Genet 47, 453</a>         |
| BBS2 | c.401C>G   | p.P134R | RP        | <a href="#">Shevach (2015) JAMA Ophthalmol 133, 312</a>        |
| BBS2 | c.406G>C   | p.A136P | BBS       | <a href="#">Deveault (2011) Hum Mutat 32, 610</a>              |
| BBS2 | c.416G>T   | p.G139V | BBS       | <a href="#">Laurier (2006) Eur J Hum Genet 14, 1195</a>        |
| BBS2 | c.415G>A   | p.G139S | BBS       | Jean Muller, unpublished                                       |
| BBS2 | c.508G>A   | p.D170N | BBS       | <a href="#">Patel (2016) Genet Med 18, 554</a>                 |

|      |                    |                |                |                                                         |
|------|--------------------|----------------|----------------|---------------------------------------------------------|
| BBS2 | c.563T>C           | p.I188T        | BBS            | Jean Muller, unpublished                                |
| BBS2 | c.626T>C           | p.L209P        | BBS            | <a href="#">Redin (2012) J Med Genet 49, 502</a>        |
| BBS2 | c.662T>C           | p.L221P        | BBS            | <a href="#">Muller (2010) Hum Genet 127, 583</a>        |
| BBS2 | c.806T>G           | p.V269G        | BBS            | <a href="#">Shaheen (2016) Genome Biol 17, 242</a>      |
| BBS2 | <b>c.899A&gt;G</b> | <b>p.D300G</b> | <b>RP</b>      | <a href="#">Xu (2015) Mol Vis 21, 477</a>               |
| BBS2 | c.921C>G           | p.C307W        | BBS            | <a href="#">Deveault (2011) Hum Mutat 32, 610</a>       |
| BBS2 | c.920G>A           | p.C307Y        | BBS            | <a href="#">Muller (2010) Hum Genet 127, 583</a>        |
| BBS2 | c.944G>A           | p.R315Q        | BBS            | <a href="#">Katsanis (2001) Science 293, 2256</a>       |
| BBS2 | c.943C>T           | p.R315W        | BBS            | <a href="#">Katsanis (2001) Science 293, 2256</a>       |
| BBS2 | c.947G>A           | p.G316D        | BBS            | <a href="#">Janssen (2011) Hum Genet 129, 79</a>        |
| BBS2 | c.950A>G           | p.Y317C        | BBS            | <a href="#">Deveault (2011) Hum Mutat 32, 610</a>       |
| BBS2 | c.1673C>T          | p.T558I        | BBS            | <a href="#">Katsanis (2001) Science 293, 2256</a>       |
| BBS2 | c.1895G>C          | p.R632P        | BBS, <b>RP</b> | <a href="#">Katsanis (2001) Science 293, 2256</a>       |
|      |                    |                |                | <a href="#">Bin (2009) Hum Mutat 30: E737</a>           |
|      |                    |                |                | <a href="#">Consugar (2015) Genet Med 17: 253</a>       |
|      |                    |                |                | <a href="#">Shevach (2015) JAMA Ophthalmol 133, 312</a> |

| Gene | Nucleotide         | Protein       | Phenotype  | Reference                                                      |
|------|--------------------|---------------|------------|----------------------------------------------------------------|
| BBS4 | c.220G>A           | p.A74T        | BBS        | Jean Muller, unpublished                                       |
| BBS4 | <b>c.253G&gt;C</b> | <b>p.E85Q</b> | <b>LCA</b> | <a href="#">Wang (2011) Mol Vis 17, 3529</a>                   |
| BBS4 | c.322G>A           | p.A108T       | BBS        | <a href="#">Glöckle (2014) Eur J Hum Genet 22, 99</a>          |
| BBS4 | c.829G>A           | p.G277R       | BBS        | <a href="#">Fattahi (2014) J Hum Genet 59, 368</a>             |
| BBS4 | c.884G>C           | p.R295P       | BBS        | <a href="#">Mykytyn (2001) Nat Genet 28, 188</a>               |
| BBS4 | c.927T>G           | p.N309K       | BBS        | <a href="#">Muller (2010) Hum Genet 127, 583</a>               |
| BBS4 | c.1091C>A          | p.A364E       | BBS        | <a href="#">Katsanis (2002) Am J Hum Genet 71, 22</a>          |
| BBS4 | c.1103A>G          | p.D368G       | BBS        | <a href="#">Karmous-Benailly (2005) Am J Hum Genet 76, 493</a> |

| Gene | Nucleotide         | Protein        | Phenotype      | Reference                                                      |
|------|--------------------|----------------|----------------|----------------------------------------------------------------|
| BBS5 | c.110T>C           | p.I37T         | BBS            | Jean Muller, unpublished                                       |
| BBS5 | c.149T>G           | p.L50R         | BBS            | <a href="#">Chen (2011) Invest Ophthalmol Vis Sci 52, 5317</a> |
| BBS5 |                    |                |                | <a href="#">Redin (2012) J Med Genet 49: 502</a>               |
| BBS5 | <b>c.148C&gt;A</b> | <b>p.L50I</b>  | <b>RP</b>      | <a href="#">Wang (2014) Hum Genet 133, 331</a>                 |
| BBS5 | c.158C>T           | p.T53I         | BBS            | <a href="#">Abu-Safieh (2012) Eur J Hum Genet 20, 420</a>      |
| BBS5 | c.166A>G           | p.R56G         | BBS            | <a href="#">Muller (2010) Hum Genet 127, 583</a>               |
| BBS5 | c.214G>A           | p.G72S         | BBS            | <a href="#">Hjortshoj (2008) Am J Med Genet A 146A, 517</a>    |
| BBS5 | c.413G>A           | p.R138H        | BBS            | <a href="#">Redin (2012) J Med Genet 49, 502</a>               |
| BBS5 | c.532G>A           | p.G178R        | BBS            | <a href="#">Shaheen (2016) Genome Biol 17, 242</a>             |
| BBS5 | c.547A>G           | p.T183A        | BBS            | <a href="#">Hjortshoj (2008) Am J Med Genet A 146A, 517</a>    |
| BBS5 | <b>c.790G&gt;A</b> | <b>p.G264R</b> | <b>Obesity</b> | <a href="#">Weisschuh (2016) PLoS One 11, e0145951</a>         |
| BBS5 | c.955_957delGAA    | p.E319del      | BBS            | <a href="#">Patel (2016) Genet Med 18, 554</a>                 |

| Gene | Nucleotide | Protein | Phenotype | Reference                                                             |
|------|------------|---------|-----------|-----------------------------------------------------------------------|
| BBS7 | c.187G>A   | p.G63R  | BBS       | <a href="#">Bin (2009) Hum Mutat 30, E737</a>                         |
| BBS7 | c.198T>G   | p.I66M  | BBS       | <a href="#">Harville (2010) J Med Genet 47, 262</a>                   |
| BBS7 | c.196A>T   | p.I66F  | BBS       | <a href="#">Hichri (2005) Eur J Hum Genet 13, 607</a>                 |
| BBS7 | c.632C>T   | p.T211I | BBS       | <a href="#">Badano (2003) Am J Hum Genet 72, 650</a>                  |
| BBS7 | c.640G>A   | p.G214R | BBS       | <a href="#">Feuillan (2011) J Clin Endocrinol Metab 96, E528</a>      |
| BBS7 | c.688T>C   | p.W230R | BBS       | <a href="#">Harville (2010) J Med Genet 47, 262</a>                   |
| BBS7 | c.716G>A   | p.G239E | BBS       | Jean Muller, unpublished                                              |
| BBS7 | c.728G>A   | p.C243Y | RP        | <a href="#">Wang (2013) J Med Genet 50, 674</a>                       |
| BBS7 |            |         | BBS       | <a href="#">Shin (2015) Ann Lab Med 35: 181</a>                       |
| BBS7 | c.878A>C   | p.Q293P | BBS       | <a href="#">Janssen (2011) Hum Genet 129, 79</a>                      |
| BBS7 | c.949C>G   | p.L317V | BBS       | <a href="#">Ece Solmaz (2015) Eur J Med Genet 58, 689</a>             |
| BBS7 | c.968A>G   | p.H323R | BBS       | <a href="#">Badano (2003) Am J Hum Genet 72, 650</a>                  |
| BBS7 | c.986G>T   | p.G329V | BBS       | Jean Muller, unpublished                                              |
| BBS7 | c.1037G>A  | p.R346Q | BBS       | <a href="#">Muller (2010) Hum Genet 127, 583</a>                      |
| BBS7 | c.1511G>A  | p.R504K | BBS       | <a href="#">de Pontual (2009) Proc Natl Acad Sci U S A 106, 13921</a> |
| BBS7 | c.1666A>C  | p.S556R | BBS       | <a href="#">Yang (2008) Mol Vis 14, 2304</a>                          |
| BBS7 | c.1786G>A  | p.E596K | BBS       | <a href="#">Harville (2010) J Med Genet 47, 262</a>                   |
| BBS7 | c.2015G>A  | p.G672D | BBS       | Jean Muller, unpublished                                              |

| Gene | Nucleotide          | Protein        | Phenotype | Reference                                                 |
|------|---------------------|----------------|-----------|-----------------------------------------------------------|
| BBS8 | c.1317G>C           | p.Q439H        | RP        | <a href="#">Goyal (2015) Clin Genet 10.1111/cge.12644</a> |
|      |                     |                | BBS       | <a href="#">Ullah (2017) Mol Vis 23:482</a>               |
| BBS8 | <b>c.1333C&gt;A</b> | <b>p.Q445K</b> | RP        | <a href="#">van Huet (2015) Mol Vis 21, 461</a>           |

| Gene | Nucleotide | Protein | Phenotype | Reference                                                |
|------|------------|---------|-----------|----------------------------------------------------------|
| BBS9 | c.242T>A   | p.V81E  | BBS       | <a href="#">Muller (2010) Hum Genet 127, 583</a>         |
| BBS9 | c.421G>A   | p.G141R | BBS       | <a href="#">Nishimura (2005) Am J Hum Genet 77, 1021</a> |
| BBS9 | c.462C>G   | p.I154M | BBS       | <a href="#">Muller (2010) Hum Genet 127, 583</a>         |
| BBS9 | c.542C>G   | p.P181R | BBS       | <a href="#">Carrigan (2016) Sci Rep 6, 33248</a>         |
| BBS9 | c.557A>G   | p.Y186C | BBS       | Jean Muller, unpublished                                 |
| BBS9 | c.727G>A   | p.E243K | BBS       | Jean Muller, unpublished                                 |
| BBS9 | c.974A>G   | p.Q325R | BBS       | Jean Muller, unpublished                                 |
